24 **ABSTRACT**

25 Although the adaptation strategies of bacteria to specific environmental conditions are  
26 widely reported, fewer studies have addressed how microbe with cosmopolitan  
27 distribution adapted to diverse habitats. *Exiguobacterium* is a versatile genus whose  
28 members have been commonly found in great variety of habitats. To understand the  
29 mechanism behind the universality of *Exiguobacterium*, we isolated 103 strains from  
30 diverse environments, and performed large-scale metabolic and adaptive ability tests.  
31 We found that the capacities of survival in a wide range of temperature, salinity and  
32 pH are common for most *Exiguobacterium* members. According to the core genome  
33 based phylogeny and ANI analysis, 26 putative species including 13 putative new  
34 ones were identified and two genetic groups were classified as Group I and II.  
35 Comparative genomic analysis revealed that *Exiguobacterium* members can not only  
36 utilize a variety of complex polysaccharides and proteins that are ubiquitous in both  
37 terrestrial and marine environments, but also have a number of chaperonins and  
38 transporters which could support them to survive in different extreme environments.  
39 In addition, we found that the species from Group I can be found in more diverse  
40 environments with larger genome size compared to those of Group II. Twenty-five  
41 transporter families involved in transport of organic or inorganic substrates and  
42 environments stresses resistance were predicted to be enriched in Group I strains. This  
43 study provided the comprehensive insight into general genetic basis of the  
44 cosmopolitan distribution of a bacteria genus and deciphered putative determinants  
45 behind the ecological difference of different groups belonging to the same genus.

46 **IMPORTANCE** The wide distribution characteristics make *Exiguobacterium* a  
47 valuable model for studying adaptive strategy of bacteria adapted to multiple habitats.  
48 In this study, we found that comprehensive capacity of diverse polysaccharides  
49 utilization and environmental stress resistance is the important basis for survival, and  
50 selective expansion of transporters is an evolution and adaptation strategy for  
51 extensive distribution. Our findings are significant for understanding the adaptation  
52 and evolution mechanisms of cosmopolitan bacteria and explaining the vital genomic

53 traits that facilitate niches adaptation.

54 **KEYWORDS** *Exiguobacterium*, cosmopolitan distribution, genomics, adaptation

55 strategies, polysaccharide utilization, transporters

56

## 57 INTRODUCTION

58 Microbial community composition and diversity across landscape is nonrandom (1).  
59 Physical and chemical factors in the environment significantly influence the  
60 distribution patterns of microbes (2). There is a barrier between marine and  
61 non-marine habitats due to their strong physiochemical difference such as salinity,  
62 temperature, pH, dissolved oxygen and water chemistry (3). As a result, most marine  
63 microbes belong to different phylogenetic groups from their freshwater and terrestrial  
64 relatives, and there are rare transitions between these two niches (4, 5). It was  
65 frequently reported that these different bacteria members usually utilize different  
66 strategy for niche adaptations. Comparative genomics of ocean microbes revealed that  
67 many marine bacteria were identified with streamlined genome to reduce metabolic  
68 costs of maintaining nonessential genetic material to adapt to the nutrient-poor ocean  
69 environments (6, 7). And it is obviously different from free-living terrestrial bacteria,  
70 which usually have normal genome size with frequent horizontal genetic transfer  
71 events to facilitate the capacity of using diverse collection of nutrients and ability of  
72 resistance to complicated adverse environments (8, 9). The transition events of marine  
73 to non-marine or in reverse for bacteria require complex genome evolution (10, 11).  
74 Events of gaining and losing gene which involved in the abilities for transport,  
75 metabolism and assimilation different types of organic or inorganic nutrients play  
76 crucial roles during this progress (10, 12). However, this knowledge is mainly derived  
77 from the comparative genomics of a few bacteria with high abundance in either  
78 marine or non-marine microbiota (13, 14). The strategies of evolution and adaptation  
79 for microbes which have wide distribution in both marine and non-marine  
80 environments are not well studied yet.

81 Bacteria of the genus *Exiguobacterium* are Gram-positive facultative anaerobes which  
82 have been frequently isolated from various habitats including seawater, marine  
83 sediment, marine algae (15-17), soil (17), freshwater (18), plant rhizosphere (19), and  
84 some extreme environments such as salt lake (20), glacier and hot spring (21).  
85 Genomic analysis of these bacteria has provided some vital insights into their

86 psychrophilic and thermophilic adaptations and multiple toxic compound resistances  
87 (22-24). However, comprehensive knowledge about these bacteria evolutionary  
88 adaptation to marine and non-marine habitats remains undiscovered.

89 In this study, *Exiguobacterium* was used as a model to study how microbes with  
90 cosmopolitan distribution adapted to both marine and terrestrial environments. We  
91 leveraged different strategies to decipher the ecology and evolution of  
92 *Exiguobacterium* spp.. We firstly mined the public database for 16S rRNA gene to  
93 reveal the diversity and distribution of the genus. Then we isolated multiple strains  
94 from marine and other habitats and tested their adaptive and metabolic features.  
95 Furthermore, we sequenced 103 strains and performed large-scale phylogenomic and  
96 comparative genomic analyses on a total 145 genomes representing strains isolated  
97 from marine and non-marine habitats worldwide. Special attention was drawn on  
98 genomic and metabolic characters responded to diverse environments.

## 99 **RESULTS AND DISCUSSION**

100 **Cosmopolitan distribution of *Exiguobacterium* spp. and their survival abilities in**  
101 **a wide range of conditions.** To explore the diversity and distribution of members  
102 belonging to *Exiguobacterium*, we focused on the bacterial strain with 16S rRNA  
103 gene sequence having an identity above 95% to that of the reported species type strain  
104 from this genus. A total of 2,582 *Exiguobacterium* 16S rRNA gene sequences with  
105 unambiguous information of isolation source were collected from Genbank (Table S1).  
106 We found that members of this genus were frequently isolated from territorial  
107 environments (86.6%), including plant or rhizosphere (16.6%), animal skin or gut  
108 (10.7%), freshwater or freshwater sediment (12.7%), contaminated water or soil (7%),  
109 soil (6.8%), extreme environments (hot- or cold-associated or hypersaline  
110 environments) (6%), air (4.8%) and other non-marine environments (22%) (Fig. 1A;  
111 Table S1). The left 13.4% members were isolated from marine-associated  
112 environments including sea water, algae and oceanic sediment. Combining the  
113 location information, we found that *Exiguobacterium* can be isolated from all of the  
114 continents and oceans. This result was accordance with the current notion that

115 *Exiguobacterium* was a cosmopolitan bacteria genus including many extremophiles  
116 surviving in both marine and non-marine environments worldwide (15).

117 To study the adaptation and evolution of *Exiguobacterium*, we performed large-scale  
118 phenotype tests and comparative genomics analysis. A total of 103 *Exiguobacterium*  
119 strains were collected here, including 87 isolates from marine-associated niches  
120 (marine sediment, seawater, algae, marine cold spring, hydrothermal vent, seamount,  
121 mangrove, marine fish and coral), 11 strains from territorial environments (soil, salt  
122 lake, coal mine and pig farm) and 5 type strains (Fig. 1B; Table S2). Among the 42  
123 *Exiguobacterium* members with genome available up to the manuscript submitted,  
124 only 4 strains were isolated from marine habitats. We used more isolates from marine  
125 than territorial environments in this study.

126 Previous studies have reported that *Exiguobacterium* spp. could survive in a wide  
127 range of habitats including cold, hot, hypersaline and alkaline environments (16),  
128 while it is unclear if these features are shared by all the members or strain/species  
129 specific.

130 To assess the survival abilities of *Exiguobacterium* spp. to diverse conditions, we  
131 evaluated the growth potential of the collected 103 strains in culture medias with  
132 different of pH, temperatures and salinity, respectively. We found that the most  
133 *Exiguobacterium* members can survive and grow in a wide range of temperature,  
134 salinity and pH values, respectively. (Fig. 1C; Table S3). The pH test revealed that all  
135 the strains were alkali-resistant which could survive in the environments with pH  
136 value up to 11, and 24% strains showed growth at pH 5 (17%) and even 4 (7%). For  
137 salinity test, most of strains showed tolerance to saline, with 66% strains growing in  
138 environment with NaCl concentration above 10%. Temperature tests showed that the  
139 *Exiguobacterium* spp. have high and low temperature tolerance, with 91% strains  
140 growing at 4°C and 61% surviving from 40 to 50°C. Moreover, no associations were  
141 found between the growth abilities and the source environments. These results suggest  
142 the extensive adaptability to survive in variable environments as a general feature of  
143 this genus.

144 **Phylogenetic analysis identified two genetic groups in *Exiguobacterium* genus.**

145 We conducted comparative genomics analysis to investigate the strategies of  
146 evolution and adaptation to diverse environments. All genomes of the 103 collected  
147 *Exiguobacterium* strains were sequenced through Illumina Novaseq 6000 platform  
148 and assembled by SPAdes software (25). The 42 *Exiguobacterium* genomes available  
149 on GenBank were also included in the comparative analysis (Table S2). All the  
150 annotated proteins from 145 genomes were clustered into 8,728 groups, with 1,162  
151 shared by all genomes classified as core gene families. The maximum-likelihood (ML)  
152 phylogenetic tree was constructed based on the core genome alignment (Fig. 2). Two  
153 genetic groups of *Exiguobacterium* were classified and well-supported by  
154 bootstrapping analysis, which is consistent with previous analysis based on 16S rRNA  
155 gene sequences (15). Using the threshold of ANI (average nucleotide identity) 95% to  
156 define different species (26), a total of 26 species can be classified including 13  
157 putative new ones (N1 to N13) (Fig. 2; Table S4). There were 11 and 15 species  
158 belonging to Group I and II, respectively (Table S4).

159 We next annotated the tree by adding the isolated environment of each strain, and  
160 found that strains from different marine and terrestrial niches distributed around the  
161 whole tree, even isolates from the same species could be found in different environments  
162 (Table S5). For example, members of *E. acetylicum* were found in seawater, ocean  
163 sediment, soil, rhizosphere, glacier and even animal gut. It is suggested that frequent  
164 transitions *Exiguobacterium* spp. among different niches of terrestrial and marine  
165 environments. This finding is different from those of some typical marine bacteria  
166 which usually contained different lineages adapting to marine and non-marine habits,  
167 respectively (27).

168 **Carbon and nitrogen source utilization for wide adaptation.** To explain the  
169 extensive distribution of *Exiguobacterium* strains in different niche types, we focused  
170 on the genes involved in different types of nutrition metabolism. Active enzymes  
171 involved in carbohydrate metabolism are defined as carbohydrate-active enzymes  
172 (CAZymes). A total of 7,864 genes belonging to 5 CAZyme superfamily were

173 identified from all the genomes, with 61.5%, 18.7%, 15.9%, 2.7% and 1.2% genes  
174 belonging to GH (glycoside hydrolase), CE (carbohydrate esterase), CBM  
175 (carbohydrate-binding module), PL (polysaccharide lyase) and AA (auxiliary  
176 activities), respectively (Fig. 3A; Table S6). Each genome sequence encoded 43 to 68  
177 of these enzymes.

178 Many classes of enzyme for complex polysaccharide degradation were predicted for  
179 *Exiguobacterium* genomes (Fig. 3B; Table S6). The top 3 abundant classes are those  
180 associated with the degradation of starch, cellulose and chitin, and most of these  
181 CAZymes are potentially secreted (Fig. 3B). Family GH13 represents the main  
182 amylolytic enzymes family, the GH13\_31 ( $\alpha$ -glucosidase) and GH13\_13 (pullulanase)  
183 are the top 2 frequent subfamilies, with 3.3 and 3 genes per genome, respectively. The  
184 most abundant family involved in cellulose degradation is GH1 ( $\beta$ -glucosidases), with  
185 each genome containing more than 4 genes. For chitin degradation, family CE4  
186 (deacetylase) and CBM50 (chitin-binding) showed significantly higher abundance.

187 As the important storage polysaccharide, starch is produced by plants from both  
188 terrestrial and marine (28, 29). Cellulose is the most prevalent polysaccharide in  
189 nature, which make up the plant and algal cell walls (30, 31). As the second common  
190 polysaccharide after cellulose in nature, chitin is also widely distributed in terrestrial  
191 and marine ecosystems as a major structural component of crustacean shell, arthropod  
192 exoskeleton and the cell wall of diatom (32-34). The abundant CAZymes contained  
193 by members of *Exiguobacterium* giving the strong putative capacity for degradation  
194 of these polysaccharides ensure these bacteria to extensively gain the carbon source  
195 and survive in variable niches of both marine and non-marine environments.

196 Proteinaceous compounds are abundant forms of organic nitrogen in aquatic and soil  
197 (35). Extracellular microbial peptidases play an important role in both marine and  
198 terrestrial environments, as they directly link to organic nitrogen degeneration to  
199 contribute the global nitrogen cycling (35). In this study, a total of 3,912 putatively  
200 secreted peptidases were assigned to 20 families, including 43.7%, 38.1%, 15% and  
201 3.2% belonging to metallo-, serine, cysteine and aspartic peptidase families,



202 respectively (Fig. 3C; Table S7). When normalized to genome size, the average  
203 number of secreted peptidase coding genes was 9 genes per Mb, which is higher than  
204 the overall level of bacteria (5.84 genes per Mb) (35). Among these peptidases, the  
205 metallo peptidase M23 and serine peptidase S08 represent the top 2 ample peptidases  
206 (Fig. 3C). M23 peptidases were reported to degenerate the bacterial extracellular  
207 peptidoglycan, contributing to nutrition acquisition or defense against competitors (36,  
208 37). Serine peptidases are often used as marker enzyme for proteolysis activity in soil,  
209 and play important roles in the utilization of nitrogen sources in the environments (38).  
210 The presence of abundant potentially secreted peptidases in *Exiguobacterium*  
211 genomes could allow them to exploit different niches for nitrogen source uptake in  
212 different environments.

213 To validate the potential ability of *Exiguobacterium* spp. to degrade and metabolize  
214 complex carbohydrates and proteins, the amylase and protease activities of the 103  
215 strains isolated in this study were tested on plates (Fig. S1). All of these strains  
216 showed effective hydrolysis ability for starch, and approximately 70% of these strains  
217 can degenerate proteins. Taking results from both the genomic analysis and activity  
218 testing together, it provided strong evidence that most members of the  
219 *Exiguobacterium* genus have the abilities to metabolic and utilize a wide range of  
220 nutrition from marine and non-marine environments, which explains the genetic basis  
221 for the cosmopolitan distribution of these bacteria.

222 **Genetic basis of keeping homeostasis in extreme environments.** As a versatile  
223 genus, *Exiguobacterium* was found to survive in many extreme environments such as  
224 cold, hot, saline and pollutant (16). Our phenotype test has proved that these adaptive  
225 characteristics are shared by most members of this genus. We investigated the putative  
226 genetic determinants behind these abilities from the whole genus.

227 Two strategies are used by bacteria to survive in cold environment, which are  
228 utilization of unsaturated branched-chain fatty acids to maintain membrane fluidity  
229 and expression of cold shock proteins (Csp) that stabilize the bacterial cytosol at low  
230 temperatures (39, 40). From the genomic analysis, we found that all members of

231 *Exiguobacterium* genus could use the both strategies to cope with low temperature.  
232 Two types of fatty acid desaturase (FAD) involved in unsaturated branched-chain fatty  
233 acid production were identified in *Exiguobacterium* genomes (Fig. 4; Table S8). All  
234 genomes except those of AB2 and s126 encoded at least one FAD1 protein, while  
235 gene for FAD2 was mainly contained by the strains belonging to Group I. Three types  
236 of *csp* (*cspA*, *cspB* and *cspC*) were predicted from all the genomes (Fig. 4). Most  
237 genomes in Group I contained more than 2 *cspA* genes while those from Group II had  
238 only one. The *cspB* and *cspC* were harbored by members from Group I and II,  
239 respectively. It was reported that members can grow below 0°C mainly belonging to  
240 Group I (15). More *csp* and *fad* genes contained by member of Group I than II may  
241 contribute to this difference.

242 To support to survive in hot environments, all strains of *Exiguobacterium* spp. contain  
243 the shock gene cluster *grpE-dnaJ-dnaK* (Fig. 4; Table S8), which encodes chaperones  
244 that prevent aggregation and denaturation of proteins at high temperature (41). It was  
245 reported that proteins GroEL/GroES cooperating with DnaK/DnaJ to prevent protein  
246 misfolding in bacteria (42). Genes encoding GroEL and GroES were also discovered  
247 in all of the strains except for EHD646 (Fig. 4; Table S8). Additionally, other 3 types  
248 of heat shock protein (HSP20, HSP33 and HSP90) were also predicted. These HSPs  
249 are important chaperone for appropriate response to heat or oxidative stress because  
250 of their capacity of preventing irreversible protein denaturation (43-46). This suggests  
251 that members of this genus utilize multiple ways to cope with heat environments.

252 In bacteria, the Na<sup>+</sup>:H<sup>+</sup> antiporters play crucial roles in the maintenance of  
253 intracellular pH homeostasis and dynamic balance of cellular Na<sup>+</sup>. According to the  
254 Transporter Classification Database (TCDB), Na<sup>+</sup>:H<sup>+</sup> antiporters mainly contain the  
255 large monovalent cation/proton antiporter (CPA) family such as CPA1, CPA2 and  
256 CPA3, and the NhaC Na<sup>+</sup>:H<sup>+</sup> antiporter family (47, 48). Seven types of CPA1 and 1  
257 from CPA2 of the Na<sup>+</sup>:H<sup>+</sup> antiporters of were predicted from the genomes of  
258 *Exiguobacterium* spp. (Fig. 4; Table S8). The Na<sup>+</sup>:H<sup>+</sup> antiporters from CPA1 and  
259 CPA2 family were found in partial *Exiguobacterium* genomes, with the former one

260 more frequently from ones of Group I and the last more common from those  
261 belonging to Group II. Compared to CPA1 and CPA2, CPA3 antiporters are more  
262 structurally complex with a multicomponent structure consisting of either seven or six  
263 members (49). This multicomponent  $\text{Na}^+:\text{H}^+$  antiporter (Mrp) has been proved to  
264 provide  $\text{Na}^+/\text{H}^+$  antiport activity and function in multiple compound resistance and pH  
265 homeostasis in *Bacillus subtilis* (49). In this study, Mrp antiporters were identified  
266 from all *Exiguobacterium* genomes (Fig. 4; Table S8). In addition, the antiporter from  
267 NhaC  $\text{Na}^+:\text{H}^+$  antiporter (NhaC) family was identified in all *Exiguobacterium*  
268 genomes with copy number up to 6 (Fig. 4; Table S8). The presence of multiple types  
269 of  $\text{Na}^+:\text{H}^+$  antiporter provides the basis for *Exiguobacterium* to maintain osmosis and  
270 pH balance in a variety of environments.

271 The combining results of the existence of diverse important proteins, including cold-  
272 and heat-shock protein, chaperonin, fatty acid desaturase and diverse  $\text{Na}^+:\text{H}^+$   
273 antiporters could explain the broad range of acceptable temperatures, pH and salinity  
274 for *Exiguobacterium* strains, and help to colonize in diverse habitats.

275 **Expansion of transporter families contributing to a wider adaptation.** By  
276 comparing the ecological difference between members of Group I and II, we found  
277 that strains from marine environments were more frequently assigned to Group II and  
278 species from Group I had a more diverse niche distribution. Based on the analysis of  
279 16S rRNA gene sequences from GenBank, there were 54 and 292 respectively  
280 belonging to Group I and II among the 346 sequences from marine environments  
281 (Table S1). As for the strains isolated in this study, there were 25 and 62 respectively  
282 belonging to Group I and II among the 87 strains from marine environments. In  
283 Group I, 10 of the 11 species contained strains isolated not only from the marine  
284 environment, but also from various terrestrial environments such as soil, plant  
285 rhizosphere, fresh water, etc (Table S5). While in Group II, most species were mainly  
286 isolated from marine-associated environments (Table S5). More diverse niche  
287 distribution suggested that the members belonging to Group I have a stronger capacity  
288 for environments adaptation.

289 To understand the genetic background behind the ecological difference of these two  
290 groups, we performed comparative genomic analysis and found a similar increasing  
291 tendency of genome size and transporter number from species of Group I to Group II  
292 (Fig. 5A; Fig. 5B and Table S9). The average genome size and transporter number of  
293 Group I (3.12Mb and 648) was significant larger than those of Group II (2.90Mb and  
294 610) ( $p < 0.0001$ , Wilcoxon test) (Fig. 5C; Fig. 5D). Moreover, the spearman  
295 correlation coefficients of transporter number with genome size and CDS number is  
296 0.86 (Fig. 5E). The significant correlation ( $p < 0.01$ ) with genome size and CDS  
297 number suggests that the expansion of transporter contributed to the difference of  
298 genome content in Group I and Group II strains.

299 Transporters are vital to all living organisms in the uptake of nutrients, secretion of  
300 metabolites, maintenance of ion concentration gradient across membranes and efflux  
301 of drug and toxins (50). In this study, 25 of the 247 identified transporter families  
302 were identified to have high degrees of correlation with both genome size and CDS  
303 number (correlation coefficients  $> 0.6$ ,  $p < 0.01$ , Table 1). These 25 transporter gene  
304 families were significantly enriched in genome of Group I compared to Group II (Fig.  
305 6; Table S9).

306 Seven of the 25 families are associated with the transport of diverse amino acids.  
307 Among them, cationic amino acid, polar amino acid, branched chain amino acid and  
308 basic amino acid are important components for nitrogen metabolism, protein synthesis,  
309 cell growth and energy production or conversion (51). Besides, 2 of the 25 families  
310 are involved in the transport of  $Mg^{2+}$ , including the cyclin M  $Mg^{2+}$  exporter family  
311 and the CorA metal ion transporter family.  $Mg^{2+}$  homeostasis is important in bacteria  
312 and has been reported to play a critical role in their thermotolerance (52, 53).  
313 Moreover, the inorganic phosphate transporter family was also expanded in Group I.  
314 Compared with the marine environment, the terrestrial environment is more diverse  
315 and has a variety of complex microenvironments due to the influence of climate or  
316 seasons, which lead to a diverse content of nutrient substrates (3, 54). The enhanced  
317 capability of Group I strains in important substrates transport meets the need of

318 cellular metabolism and functions, and provides important base to survive in more  
319 diverse terrestrial environments.

320 Three of the 25 transporter families are involved in transport of heavy metals ions,  
321 including the arsenite-antimonite efflux family, the iron/lead transporter family and  
322 peptide/opine/nickel uptake transporter family. These transporters have been shown to  
323 counteract the effects of toxic heavy metals (55-57). The members of major facilitator  
324 superfamily (MFS) are capable of transporting a wide range of substrates in response  
325 to ion gradients or function as drug:H<sup>+</sup> antiporter; and majority of bacterial drug  
326 efflux pumps classified within the MFS (58, 59). Four of the 25 families are  
327 belonging to MFS superfamily, among which 2 are associated with drug efflux.  
328 Moreover, 2 of the 25 families are involved in the formation of bacterial cell wall and  
329 biofilm, including the teichoic acid exporter family and the 4 TMS GlpM family.  
330 Teichoic acid is a major cell wall component of Gram-positive bacteria, and has been  
331 proved to play crucial roles in bacterial resistance to antimicrobial and survival under  
332 disadvantageous conditions (60, 61). The members of 4 TMS GlpM family is required  
333 for normal production of alginate (62). Alginates are important polymeric substances  
334 contributing to the formation and development of biofilm matrixes of numerous  
335 bacteria enhancing colonization and persistence under environmental stresses (63).  
336 Due to the emission or leach out from the industrial and agricultural fields, terrestrial  
337 and freshwater ecosystems are contaminated with heavy metals or pesticide severely  
338 (64, 65). The expansion of transporters involved in disadvantageous conditions  
339 resistance and efflux of drug and heavy metals may contribute a more diverse  
340 distribution in non-marine habitats of Group I strains.

341 Efficient transport of substances related to metabolism, cellular function or  
342 environment stresses resistance is crucial for bacterial survival in a variety of  
343 environments (66). In order to survive in more diverse environments, bacteria have to  
344 develop specific systems for their survival such as nutrient sensing and transport  
345 systems (67). Bacteria are often exposed to stress conditions in many stages of their  
346 life cycle; and the capacity of environmental stress resistance determines the

347 distribution of microorganisms (68, 69). Therefore, these expanded families that  
348 related to environment stresses resistance and transport of organic or inorganic  
349 substrates, may play crucial roles for *Exiguobacterium* spp. from Group I to survive in  
350 more diverse environments.

351 **Conclusions.** Numerous studies have investigated the evolution and adaptation  
352 mechanism of important pathogens (70). However, fewer studies have addressed how  
353 microbes with cosmopolitan distribution but relative low abundance to adapt to  
354 diverse habitats. The wide distribution characteristic makes the genus  
355 *Exiguobacterium* as a valuable model for studying the adaptive strategy of bacteria to  
356 multiple habitats. This study suggested that these bacteria with nomadic lifestyle and  
357 cosmopolitan distribution are usual generalists, which can utilize a variety of nutrients  
358 simultaneously and resist diverse environmental stresses.

359 Although strains of *Exiguobacterium* genus are generalists, the ecological difference  
360 between members of Group I and II was still discovered. We found the species from  
361 Group I was distributed in more diverse environments with larger genome size and  
362 the expansion of transporter families contributed to the difference of genome size.  
363 Most of the enriched transporter families are involved in environment stresses  
364 resistance and transport of organic or inorganic substrates, which may play vital role  
365 for Group I strains in adaptation to wider habitats.

## 366 **MATERIALS AND METHODS**

367 **Analysis of *Exiguobacterium* 16S rRNA gene sequences.** We retrieved  
368 *Exiguobacterium* 16S rRNA gene sequences from GenBank. The information of  
369 isolation source of these sequences was collected. The habitats were classified into 13  
370 types, including air, animal-associated environments, cold-associated environments,  
371 estuary-associated environments, contaminated water or soil, freshwater or freshwater  
372 sediment, hot-associated environments, hypersaline environments, marine-associated  
373 environments, plant, rhizosphere, soil and other inland environments.

374 **Bacterial isolation and culture.** A total of 103 strains were used for adaptive

375 experiments and genome sequencing, including 98 isolated from terrestrial and  
376 marine environments worldwide by us, and 5 type strains obtained from DSMZ and  
377 CGMCC (Table S2). Initially samples from marine and terrestrial environments were  
378 macerated and mixed with sterile saline solution (0.8%) using a standard dilution  
379 plating method on Marine agar 2216 (MA, Difco) and LB agar at 20 °C, respectively.  
380 All these 103 strains can grow in sea salts free medium and were routinely cultivated  
381 on LB agar and in liquid LB for subsequent genomic sequencing.

382 **Adaptive ability tests of pH, temperature and salinity.** To assess the range of  
383 adaptation to pH, temperature and salinity, all of the 103 strains were measured for  
384 assessing growth under the following conditions. The temperature range for growth  
385 were measured at 4, 25, 30, 40, 45 and 55 °C (the lowest growth temperature was not  
386 recorded for the strain that could not grow at 4°C) on LB and in liquid LB. The pH  
387 range for growth was determined at 25 °C in liquid LB medium at pH 4.0-12.0 (with  
388 intervals of 1 units) using the following buffers: citrate/Na<sub>2</sub>HPO<sub>4</sub> buffer (pH 4.0-7.0),  
389 Tris buffer (pH 7.5-9.0) and NaHCO<sub>3</sub>/Na<sub>2</sub>CO<sub>3</sub> buffer (pH 9.5-10.0); growth was  
390 evaluated by measuring OD<sub>600</sub> after 7 days of incubation. Growth with 0–15% (in 1 %  
391 increments, w/v) NaCl was investigated after 14 days of cultivation at 25 °C in the  
392 following medium: 0.1% peptone, 0.1% yeast extract, 0.03% KCl, 0.25%  
393 MgSO<sub>4</sub>·7H<sub>2</sub>O, 0.05% CaCl<sub>2</sub>.

394 **Degradation ability tests of complex carbohydrates and proteins.** Protease and  
395 amylase activities were tested on LB agar supplemented with skim milk (2%, w/v)  
396 and starch (0.4%, w/v). After 4–6 days at 25°C, a positive reaction was noticed when  
397 transparent zones around the colonies were directly visible or detected after coloration  
398 of the undegraded substrate.

399 **Genome sequencing, assembly and annotation.** Genomic DNA was extracted by  
400 using a bacterial genomic DNA Mini kit (TaKaRa Bio) following the manufacturer's  
401 protocol. Genomes of the 103 *Exiguobacterium* strains were sequenced using Illumina  
402 NovaSeq 6000 platform. The raw reads of each genome were trimmed using  
403 trimmomatic v0.36 (71) and *de novo* assembled using (25). The genomes of

404 *Exiguobacterium* deposited in GenBank were collected and filtered based on the  
405 criterion that genomes were at least 95% complete, with < 5% contamination based  
406 on CheckM analysis (72). The ANI values between two each genome pair was  
407 computed using the OrthoANI software (73). Gene predictions and annotations of all  
408 genomes were generated using Prokka (74).

409 **Phylogenetic tree construction.** Analysis of orthologous clusters was performed  
410 using the FastOrtho (<http://enews.patricbrc.org/fastortho/>), a faster reimplementa-  
411 tion of OrthoMCL (75). In brief, an all-against-all BLAST was firstly performed with  
412  $E$ -values <  $1 \times 10^{-5}$ . Then, ortholog groups were created with the MCL algorithm with  
413 an inflation value of 2, and the single-copy gene families were obtained using  
414 custom-made Python scripts. Protein sequences of each family were aligned by  
415 MUSCLE (76) and then trimmed by trimAL (77). All trimmed alignments were then  
416 concatenated into a new alignment by a local Python script. Single-copy core  
417 gene-based phylogenetic tree was constructed using RAxML (78) with 1000 bootstrap  
418 replicates, employing the LG+I+G+F model. iTOL was used for the phylogenetic tree  
419 visualization (79).

420 **Identification of carbohydrate-active enzymes and proteases.** For genes encoding  
421 carbohydrate-active enzymes and proteases, all of the annotation genes were searched  
422 against the CAZy database ([www.cazy.org](http://www.cazy.org)) (80) and peptidase database (MEROPS)  
423 (81) with  $E$ -values <  $1 \times 10^{-5}$  by BLASTP. The potential secreted carbohydrate-active  
424 enzymes and peptidases were confirmed based on the identification of extracellular  
425 transport signals using SignalP (82). Genes related to carbohydrate-active enzymes  
426 and proteases were further classified into different groups according to the  
427 predictions.

428 **Identification of vital genes for environmental stresses resistance.** For each  
429 predicted protein by Prokka were annotated using BLASTP and Hmmscan against  
430 Clusters of Orthologous Groups (COG) database and PFAM database with  $E$ -values <  
431  $1 \times 10^{-5}$ , respectively. Transporters were predicted by performing BLASTP with  
432  $E$ -values <  $1 \times 10^{-10}$  using *Exiguobacterium* protein sequences against all Transporter



433 Classification Database (TCDB) sequences (83).

434 **Data analyses.** Statistical analyses were performed using Wilcoxon test. Correlation  
435 analysis on the genome size, CDS number and transporter number was performed  
436 using `chart.Correlation` from the `PerformanceAnalytics` package in R  
437 (<https://cran.r-project.org/web/packages/PerformanceAnalytics/index.html>).

438 **Data availability.** The genomes supporting the results have been deposited at  
439 DDBJ/ENA/GenBank under the BioProjectID PRJNA644789 (accession numbers  
440 from JACSJK000000000 to JACSNI000000000) (Table S2).

#### 441 **ACKNOWLEDGEMENTS**

442 This study was supported by National Natural Science Foundation of China  
443 (31670002, 31970003 and 31770003).

444 We declare that we have no conflict of interest.

445

446 **REFERENCE**

- 447 1. Martiny JBH, Bohannan BJM, Brown JH, Colwell RK, Fuhrman JA, Green JL,  
448 Horner-Devine MC, Kane M, Krumins JA, Kuske CR, Morin PJ, Naeem S, Øvreås L,  
449 Reysenbach A-L, Smith VH, Staley JT. 2006. Microbial biogeography: putting  
450 microorganisms on the map. *Nature Reviews Microbiology* 4:102-112.
- 451 2. Bock C, Jensen M, Forster D, Marks S, Nuy J, Psenner R, Beisser D, Boenigk J. 2020. Factors  
452 shaping community patterns of protists and bacteria on a European scale. *Environ Microbiol*  
453 22:2243-2260.
- 454 3. Valli S, Suvathi SS, Aysha OS, Nirmala P, Vinoth KP, Reena A. 2012. Antimicrobial potential  
455 of *Actinomycetes* species isolated from marine environment. *Asian Pacific Journal of Tropical*  
456 *Biomedicine* 2:469-473.
- 457 4. Logares R, Bråte J, Bertilsson S, Clasen JL, Shalchian-Tabrizi K, Rengefors K. 2009.  
458 Infrequent marine–freshwater transitions in the microbial world. *Trends Microbiol*  
459 17:414-422.
- 460 5. Logares R, Shalchian-Tabrizi K, Boltovskoy A, Rengefors K. 2007. Extensive dinoflagellate  
461 phylogenies indicate infrequent marine–freshwater transitions. *Mol Phylogen Evol*  
462 45:887-903.
- 463 6. Getz EW, Tithi SS, Zhang LQ, Aylward FO. 2018. Parallel evolution of genome streamlining  
464 and cellular bioenergetics across the marine radiation of a bacterial phylum. *mBio*  
465 9:e01089-18.
- 466 7. Grote J, Thrash JC, Huggett MJ, Landry ZC, Carini P, Giovannoni SJ, Rappé MS. 2012.  
467 Streamlining and core genome conservation among highly divergent members of the SAR11  
468 clade. *mBio* 3:e00252-12.
- 469 8. Elser JJ, Bracken MES, Cleland EE, Gruner DS, Harpole WS, Hillebrand H, Ngai JT,  
470 Seabloom EW, Shurin JB, Smith JE. 2007. Global analysis of nitrogen and phosphorus  
471 limitation of primary producers in freshwater, marine and terrestrial ecosystems. *Ecol Lett*  
472 10:1135-1142.
- 473 9. Eichorst SA, Trojan D, Roux S, Herbold C, Rattei T, Woebken D. 2018. Genomic insights into  
474 the *Acidobacteria* reveal strategies for their success in terrestrial environments. *Environ*  
475 *Microbiol* 20:1041-1063.
- 476 10. Zhang H, Yoshizawa S, Sun Y, Huang YJ, Chu X, González JM, Pinhassi J, Luo HW. 2019.  
477 Repeated evolutionary transitions of flavobacteria from marine to non-marine habitats.  
478 *Environ Microbiol* 21:648-666.
- 479 11. Cabello-Yeves PJ, Rodriguez-Valera F. 2019. Marine-freshwater prokaryotic transitions  
480 require extensive changes in the predicted proteome. *Microbiome* 7:117.
- 481 12. Tanaka M, Kumakura D, Mino S, Doi H, Ogura Y, Hayashi T, Yumoto I, Cai M, Zhou YG,  
482 Gomez-Gil B, Araki T, Sawabe T. 2020. Genomic characterization of closely related species in  
483 the Rumoiensis clade infers ecogenomic signatures to non-marine environments. *Environ*  
484 *Microbiol* 22:3205-3217.
- 485 13. Giovannoni SJ. 2017. SAR11 bacteria: The most abundant plankton in the oceans. *Annual*  
486 *Review of Marine Science* 9:231-255.
- 487 14. Santoro AE, Richter RA, Dupont CL. 2019. Planktonic marine archaea. *Annual review of*  
488 *marine science* 11:131-158.

- 489 15. Vishnivetskaya TA, Kathariou S, Tiedje JM. 2009. The *Exiguobacterium* genus: biodiversity  
490 and biogeography. *Extremophiles* 13:541-555.
- 491 16. Kasana RC, Pandey CB. 2018. *Exiguobacterium*: an overview of a versatile genus with  
492 potential in industry and agriculture. *Crit Rev Biotechnol* 38:141-156.
- 493 17. Singh NK, Raichand R, Kaur I, Kaur C, Pareek S, Mayilraj S. 2013. *Exiguobacterium*  
494 *himhiriensis* sp. nov. a novel member of the genus *Exiguobacterium*, isolated from the Indian  
495 Himalayas. *Antonie Van Leeuwenhoek* 103:789-796.
- 496 18. Raichand R, Pareek S, Singh NK, Mayilraj S. 2012. *Exiguobacterium aquaticum* sp. nov., a  
497 member of the genus *Exiguobacterium*. *Int J Syst Evol Microbiol* 62:2150-2155.
- 498 19. Khandare RV, Rane NR, Waghmode TR, Govindwar SP. 2012. Bacterial assisted  
499 phytoremediation for enhanced degradation of highly sulfonated diazo reactive dye.  
500 *Environmental Science and Pollution Research* 19:1709-1718.
- 501 20. Jiang X, Xue Y, Wang L, Yu B, Ma Y. 2013. Genome sequence of a novel polymer-grade  
502 L-lactate-producing alkaliphile, *Exiguobacterium* sp. strain 8-11-1. *Genome Announcements*  
503 1:e00616-13.
- 504 21. Vishnivetskaya TA, Lucas S, Copeland A, Lapidus A, Glavina del Rio T, Dalin E, Tice H,  
505 Bruce DC, Goodwin LA, Pitluck S, Saunders E, Brettin T, Detter C, Han C, Larimer F, Land  
506 ML, Hauser LJ, Kyrpides NC, Ovchinnikova G, Kathariou S, Ramaley RF, Rodrigues DF,  
507 Hendrix C, Richardson P, Tiedje JM. 2011. Complete genome sequence of the thermophilic  
508 bacterium *Exiguobacterium* sp. AT1b. *J Bacteriol* 193:2880.
- 509 22. Gutiérrez-Preciado A, Vargas-Chávez C, Reyes-Prieto M, Ordoñez OF, Santos-García D,  
510 Rosas-Pérez T, Valdivia-Anistro J, Rebollar EA, Saralegui A, Moya A, Merino E, Farías ME,  
511 Latorre A, Souza V. 2017. The genomic sequence of *Exiguobacterium chiriquicha* str. N139  
512 reveals a species that thrives in cold waters and extreme environmental conditions. *PeerJ*  
513 5:e3162.
- 514 23. Dias LM, Folador ARC, Oliveira AM, Ramos RTJ, Silva A, Baraúna RA. 2018. Genomic  
515 architecture of the two cold-adapted genera *Exiguobacterium* and *Psychrobacter*: evidence of  
516 functional reduction in the *Exiguobacterium antarcticum* B7 Genome. *Genome Biology and*  
517 *Evolution* 10:731-741.
- 518 24. Castro-Severyn J, Pardo-Esté C, Mendez KN, Morales N, Marquez SL, Molina F,  
519 Remonsellez F, Castro-Nallar E, Saavedra CP. 2020. Genomic variation and arsenic tolerance  
520 emerged as niche specific adaptations by different *Exiguobacterium* strains isolated from the  
521 extreme Salar de Huasco environment in Chilean – Altiplano. *Frontiers in Microbiology* 11.
- 522 25. Bankevich A, Nurk S, Antipov D, Gurevich AA, Dvorkin M, Kulikov AS, Lesin VM,  
523 Nikolenko SI, Pham S, Prjibelski AD, Pyshkin AV, Sirotkin AV, Vyahhi N, Tesler G,  
524 Alekseyev MA, Pevzner PA. 2012. SPAdes: a new genome assembly algorithm and its  
525 applications to single-cell sequencing. *J Comput Biol* 19:455-477.
- 526 26. Kim M, Oh H-S, Park S-C, Chun J. 2014. Towards a taxonomic coherence between average  
527 nucleotide identity and 16S rRNA gene sequence similarity for species demarcation of  
528 prokaryotes. *Int J Syst Evol Microbiol* 64:346-351.
- 529 27. Logares R, Brâte J, Heinrich F, Shalchian-Tabrizi K, Bertilsson S. 2009. Infrequent transitions  
530 between saline and fresh waters in one of the most abundant microbial lineages (SAR11). *Mol*  
531 *Biol Evol* 27:347-357.
- 532 28. Collinson SR, Thielemans W. 2010. The catalytic oxidation of biomass to new materials

- 533 focusing on starch, cellulose and lignin. Coordination Chemistry Reviews 254:1854-1870.
- 534 29. Prabhu M, Chemodanov A, Gottlieb R, Kazir M, Nahor O, Gozin M, Israel A, Livney YD,  
535 Golberg A. 2019. Starch from the sea: the green macroalga *Ulva ohnoi* as a potential source  
536 for sustainable starch production in the marine biorefinery. Algal Research 37:215-227.
- 537 30. Domozych DS, Ciancia M, Fangel JU, Mikkelsen MD, Ulvskov P, Willats WGT. 2012. The  
538 cell walls of green algae: a journey through evolution and diversity. Frontiers in plant science  
539 3:82-82.
- 540 31. Broxterman SE, Schols HA. 2018. Interactions between pectin and cellulose in primary plant  
541 cell walls. Carbohydrate Polymers 192:263-272.
- 542 32. Rinaudo M. 2006. Chitin and chitosan: Properties and applications. Progress in Polymer  
543 Science 31:603-632.
- 544 33. Nguyen STC, Freund HL, Kasanjian J, Berlemont R. 2018. Function, distribution, and  
545 annotation of characterized cellulases, xylanases, and chitinases from CAZy. Appl Microbiol  
546 Biotechnol 102:1629-1637.
- 547 34. Elieh-Ali-Komi D, Hamblin MR. 2016. Chitin and chitosan: Production and application of  
548 versatile biomedical nanomaterials. International journal of advanced research 4:411-427.
- 549 35. Nguyen TTH, Myrold DD, Mueller RS. 2019. Distributions of extracellular peptidases across  
550 prokaryotic genomes reflect phylogeny and habitat. Frontiers in microbiology 10:413-413.
- 551 36. Stohl EA, Chan YA, Hackett KT, Kohler PL, Dillard JP, Seifert HS. 2012. *Neisseria*  
552 *gonorrhoeae* virulence factor NG1686 is a bifunctional M23B family metallopeptidase that  
553 influences resistance to hydrogen peroxide and colony morphology. J Biol Chem  
554 287:11222-11233.
- 555 37. Baba T, Schneewind O. 1996. Target cell specificity of a bacteriocin molecule: a C-terminal  
556 signal directs lysostaphin to the cell wall of *Staphylococcus aureus*. The EMBO Journal  
557 15:4789-4797.
- 558 38. Fuka MM, Engel M, Gattinger A, Bausenwein U, Sommer M, Munch JC, Schlöter M. 2008.  
559 Factors influencing variability of proteolytic genes and activities in arable soils. Soil Biol  
560 Biochem 40:1646-1653.
- 561 39. Barria C, Malecki M, Arraiano C. 2013. Bacterial adaptation to cold. Microbiology  
562 159:2437-2443.
- 563 40. De Maayer P, Anderson D, Cary C, Cowan DA. 2014. Some like it cold: understanding the  
564 survival strategies of psychrophiles. EMBO reports 15:508-517.
- 565 41. Feder ME, Hofmann GE. 1999. Heat-shock proteins, molecular chaperones, and the stress  
566 response: evolutionary and ecological physiology. Annu Rev Physiol 61:243-282.
- 567 42. Gragerov A, Nudler E, Komissarova N, Gaitanaris GA, Gottesman ME, Nikiforov V. 1992.  
568 Cooperation of GroEL/GroES and DnaK/DnaJ heat shock proteins in preventing protein  
569 misfolding in *Escherichia coli*. Proc Natl Acad Sci 89:10341.
- 570 43. Narberhaus F. 2002.  $\alpha$ -Crystallin-type heat shock proteins: socializing minichaperones in the  
571 context of a multichaperone network. Microbiol Mol Biol Rev 66:64-93.
- 572 44. Wholey WY, Jakob U. 2012. Hsp33 confers bleach resistance by protecting elongation factor  
573 Tu against oxidative degradation in *Vibrio cholerae*. Mol Microbiol 83:981-991.
- 574 45. Honoré FA, Méjean V, Genest O. 2017. Hsp90 is essential under heat stress in the bacterium  
575 *Shewanella oneidensis*. Cell Reports 19:680-687.
- 576 46. Segal N, Shapira M. 2015. HSP33 in eukaryotes – an evolutionary tale of a chaperone adapted

- 577 to photosynthetic organisms. *The Plant Journal* 82:850-860.
- 578 47. Krulwich TA, Hicks DB, Ito M. 2009. Cation/proton antiporter complements of bacteria: why  
579 so large and diverse? *Mol Microbiol* 74:257-260.
- 580 48. Lee C, Kang HJ, von Ballmoos C, Newstead S, Uzdavinyas P, Dotson DL, Iwata S, Beckstein  
581 O, Cameron AD, Drew D. 2013. A two-domain elevator mechanism for sodium/proton  
582 antiport. *Nature* 501:573-577.
- 583 49. Kajiyama Y, Otagiri M, Sekiguchi J, Kosono S, Kudo T. 2007. Complex formation by the  
584 *mrpABCDEFG* gene products, which constitute a principal Na<sup>+</sup>/H<sup>+</sup> antiporter in *Bacillus*  
585 *subtilis*. *J Bacteriol* 189:7511.
- 586 50. Busch W, Saier MH. 2002. The transporter classification (TC) system, 2002. *Crit Rev*  
587 *Biochem Mol Biol* 37:287-337.
- 588 51. Tesseraud S, Everaert N, Boussaid-Om Ezzine S, Collin A, Métayer-Coustard S, Berri C. 2011.  
589 Manipulating tissue metabolism by amino acids. *World's Poultry Science Journal* 67:243-252.
- 590 52. Prasad D, Verma N, Bakshi M, Narayan OP, Singh AK, Dua M, Johri AK. 2019. Functional  
591 characterization of a magnesium transporter of root endophytic fungus *Piriformospora indica*.  
592 *Frontiers in Microbiology* 9.
- 593 53. Yang Y, Huang S, Wang J, Jan G, Jeantet R, Chen XD. 2017. Mg<sup>2+</sup> improves the  
594 thermotolerance of probiotic *Lactobacillus rhamnosus* GG, *Lactobacillus casei* Zhang and  
595 *Lactobacillus plantarum* P-8. *Lett Appl Microbiol* 64:283-288.
- 596 54. DeMarco J, Mack MC, Bret-Harte MS. 2011. The effects of snow, soil microenvironment, and  
597 soil organic matter quality on N availability in three Alaskan Arctic plant communities.  
598 *Ecosystems* 14:804-817.
- 599 55. Große C, Scherer J, Koch D, Otto M, Taudte N, Grass G. 2006. A new ferrous iron-uptake  
600 transporter, EfeU (YcdN), from *Escherichia coli*. *Mol Microbiol* 62:120-131.
- 601 56. Zhao FJ. 2016. A novel pathway of arsenate detoxification. *Mol Microbiol* 100:928-930.
- 602 57. Cavazza C. 2011. Extracytoplasmic Nickel - binding proteins. *Encyclopedia of Inorganic and*  
603 *Bioinorganic Chemistry*:1-11.
- 604 58. dos Santos SC, Teixeira MC, Dias PJ, Sá-Correia I. 2014. MFS transporters required for  
605 multidrug/multixenobiotic (MD/MX) resistance in the model yeast: understanding their  
606 physiological function through post-genomic approaches. *Frontiers in Physiology* 5.
- 607 59. Chen LH, Tsai HC, Yu PL, Chung KR. 2017. A major facilitator superfamily  
608 transporter-mediated resistance to oxidative stress and fungicides requires Yap1, Skn7, and  
609 MAP kinases in the citrus fungal pathogen *Alternaria alternata*. *PLoS One* 12.
- 610 60. Chen L, Hou WT, Fan T, Liu BH, Pan T, Li YH, Jiang YL, Wen W, Chen ZP, Sun LF, Zhou  
611 CZ, Chen YX. 2020. Cryo-electron microscopy structure and transport mechanism of a wall  
612 teichoic acid abc transporter. *mBio* 11:e02749-19.
- 613 61. Swoboda JG, Campbell J, Meredith TC, Walker S. 2010. Wall teichoic acid function,  
614 biosynthesis, and inhibition. *ChemBioChem* 11:35-45.
- 615 62. Schweizer HP, Po C, Bacic MK. 1995. Identification of *Pseudomonas aeruginosa glpM*,  
616 whose gene product is required for efficient alginate biosynthesis from various carbon sources.  
617 *J Bacteriol* 177:4801.
- 618 63. Moradali MF, Rehm BHA. 2019. The role of alginate in bacterial biofilm formation, p  
619 517-537. *In* Cohen E, Merzendorfer H (ed), *Extracellular sugar-based biopolymers matrices*  
620 doi:10.1007/978-3-030-12919-4\_13. Springer International Publishing, Cham.

- 621 64. Xing W, Zheng Y, Scheckel KG, Luo Y, Li L. 2019. Spatial distribution of smelter emission  
622 heavy metals on farmland soil. *Environ Monit Assess* 191:115.
- 623 65. Haddaway NR, Brown C, Eggers S, Josefsson J, Kronvang B, Randall N, Uusi-Kämpä J.  
624 2016. The multifunctional roles of vegetated strips around and within agricultural fields. A  
625 systematic map protocol. *Environmental Evidence* 5:18.
- 626 66. Lorca GL, Barabote RD, Zlotopolski V, Tran C, Winnen B, Hvorup RN, Stonestrom AJ,  
627 Nguyen E, Huang L-W, Kim DS, Saier MH. 2007. Transport capabilities of eleven  
628 gram-positive bacteria: comparative genomic analyses. *Biochim Biophys Acta*  
629 1768:1342-1366.
- 630 67. Samyn DR, Persson BL. 2016. Inorganic phosphate and sulfate transport in *S. cerevisiae*, p  
631 253-269. In Ramos J, Sychrová H, Kschicho M (ed), *Yeast membrane transport*  
632 doi:10.1007/978-3-319-25304-6\_10. Springer International Publishing, Cham.
- 633 68. Chu H, Fierer N, Lauber CL, Caporaso JG, Knight R, Grogan P. 2010. Soil bacterial diversity  
634 in the Arctic is not fundamentally different from that found in other biomes. *Environ*  
635 *Microbiol* 12:2998-3006.
- 636 69. Jock S, Langlotz C, Geider K. 2005. Survival and possible spread of *Erwinia amylovora* and  
637 related plant-pathogenic bacteria exposed to environmental stress conditions. *J Phytopathol*  
638 153:87-93.
- 639 70. Sperandio V. 2018. Pathogens' adaptation to the human host. *Proc Natl Acad Sci* 115:9342.
- 640 71. Bolger AM, Lohse M, Usadel B. 2014. Trimmomatic: a flexible trimmer for Illumina  
641 sequence data. *Bioinformatics* 30:2114-2120.
- 642 72. Parks DH, Imelfort M, Skennerton CT, Hugenholtz P, Tyson GW. 2015. CheckM: assessing  
643 the quality of microbial genomes recovered from isolates, single cells, and metagenomes.  
644 *Genome Res* 25:1043-1055.
- 645 73. Lee I, Ouk Kim Y, Park S-C, Chun J. 2016. OrthoANI: An improved algorithm and software  
646 for calculating average nucleotide identity. *Int J Syst Evol Microbiol* 66:1100-1103.
- 647 74. Seemann T. 2014. Prokka: rapid prokaryotic genome annotation. *Bioinformatics*  
648 30:2068-2069.
- 649 75. Li L, Stoeckert CJ, Roos DS. 2003. OrthoMCL: identification of ortholog groups for  
650 eukaryotic genomes. *Genome Res* 13:2178-2189.
- 651 76. Edgar RC. 2004. MUSCLE: multiple sequence alignment with high accuracy and high  
652 throughput. *Nucleic Acids Res* 32:1792-1797.
- 653 77. Capella-Gutiérrez S, Silla-Martínez JM, Gabaldón T. 2009. trimAl: a tool for automated  
654 alignment trimming in large-scale phylogenetic analyses. *Bioinformatics* 25:1972-1973.
- 655 78. Stamatakis A. 2014. RAxML version 8: a tool for phylogenetic analysis and post-analysis of  
656 large phylogenies. *Bioinformatics* 30:1312-1313.
- 657 79. Letunic I, Bork P. 2019. Interactive Tree Of Life (iTOL) v4: recent updates and new  
658 developments. *Nucleic Acids Res* 47:W256-W259.
- 659 80. Cantarel BL, Coutinho PM, Rancurel C, Bernard T, Lombard V, Henrissat B. 2008. The  
660 Carbohydrate-Active EnZymes database (CAZy): an expert resource for glycogenomics.  
661 *Nucleic Acids Res* 37:D233-D238.
- 662 81. Rawlings ND, Waller M, Barrett AJ, Bateman A. 2013. MEROPS: the database of proteolytic  
663 enzymes, their substrates and inhibitors. *Nucleic Acids Res* 42:D503-D509.
- 664 82. Petersen TN, Brunak S, von Heijne G, Nielsen H. 2011. SignalP 4.0: discriminating signal

665 peptides from transmembrane regions. Nat Methods 8:785-786.  
666 83. Saier MH, Jr., Reddy VS, Tamang DG, Västermark Å. 2013. The transporter classification  
667 database. Nucleic Acids Res 42:D251-D258.

668 **Table 1** Correlation analysis of transporter family with both genome size and CDS number.

669

| Genome content | TC number    | Family                                                          | Correlation coefficients | p-value  |
|----------------|--------------|-----------------------------------------------------------------|--------------------------|----------|
| Genome size    | 2.A.1        | <b>The Major Facilitator (MFS) Superfamily</b>                  | 0.73                     | 0        |
| CDS number     | 2.A.1        |                                                                 | 0.66                     | 0        |
| Genome size    | 2.A.1.3      | The Drug:H <sup>+</sup> Antiporter-2 (14 Spanner) (DHA2) Family | 0.73                     | 0        |
| CDS number     | 2.A.1.3      |                                                                 | 0.66                     | 0        |
| Genome size    | 2.A.1.76     | The Uncharacterized Major Facilitator 24 Family                 | 0.69                     | 0        |
| CDS number     | 2.A.1.76     |                                                                 | 0.61                     | 4.44E-16 |
| Genome size    | 2.A.1.32     | The Putative Aromatic Compound/Drug Exporter (ACDE) Family      | 0.68                     | 0        |
| CDS number     | 2.A.1.32     |                                                                 | 0.60                     | 8.88E-16 |
| Genome size    | 2.A.1.6      | The Metabolite:H <sup>+</sup> Symporter (MHS) Family            | 0.66                     | 0        |
| CDS number     | 2.A.1.6      |                                                                 | 0.67                     | 0        |
| Genome size    | <b>2.A.3</b> | <b>The Amino Acid-Polyamine-Organocation (APC) Superfamily</b>  | 0.67                     | 0        |
| CDS number     | <b>2.A.3</b> |                                                                 | 0.61                     | 2.22E-16 |
| Genome size    | 2.A.3.1      | The Amino Acid Transporter (AAT) Family                         | 0.71                     | 0        |
| CDS number     | 2.A.3.1      |                                                                 | 0.66                     | 0        |
| Genome size    | 2.A.3.3      | The Cationic Amino Acid Transporter (CAT) Family                | 0.68                     | 0        |
| CDS number     | 2.A.3.3      |                                                                 | 0.60                     | 8.88E-16 |
| Genome size    | <b>3.A.1</b> | <b>The ATP-binding Cassette (ABC) Superfamily</b>               | 0.75                     | 0        |
| CDS number     | <b>3.A.1</b> |                                                                 | 0.69                     | 0        |
| Genome size    | 3.A.1.5      | The Peptide/Opine/Nickel Uptake Transporter (PepT) Family       | 0.72                     | 0        |
| CDS number     | 3.A.1.5      |                                                                 | 0.68                     | 0        |
| Genome size    | 3.A.1.3      | The Polar Amino Acid Uptake Transporter (PAAT) Family           | 0.73                     | 0        |
| CDS number     | 3.A.1.3      |                                                                 | 0.66                     | 0        |



|             |           |                                                                                                   |      |          |
|-------------|-----------|---------------------------------------------------------------------------------------------------|------|----------|
| Genome size | 3.A.1.155 | The Phage Infection Protein (PIP) Family                                                          | 0.72 | 0        |
| CDS number  | 3.A.1.155 |                                                                                                   | 0.63 | 0        |
| Genome size | 3.A.1.104 | The Teichoic Acid Exporter (TAE) Family                                                           | 0.68 | 0        |
| CDS number  | 3.A.1.104 |                                                                                                   | 0.60 | 1.33E-15 |
| Genome size | 1.A.112   | The Cyclin M Mg <sup>2+</sup> Exporter (CNNM) Family                                              | 0.72 | 0        |
| CDS number  | 1.A.112   |                                                                                                   | 0.70 | 0        |
| Genome size | 1.A.8     | The Major Intrinsic Protein (MIP) Family                                                          | 0.70 | 0        |
| CDS number  | 1.A.8     |                                                                                                   | 0.61 | 2.22E-16 |
| Genome size | 1.A.35    | The CorA Metal Ion Transporter (MIT) Family                                                       | 0.68 | 0        |
| CDS number  | 1.A.35    |                                                                                                   | 0.60 | 8.88E-16 |
| Genome size | 1.I.3     | The Bacterial (Planctomycetes) Nuclear Pore-like Complex (B-NPC) Family                           | 0.63 | 0        |
| CDS number  | 1.I.3     |                                                                                                   | 0.62 | 2.22E-16 |
| Genome size | 2.A.23    | The Dicarboxylate/Amino Acid:Cation (Na <sup>+</sup> or H <sup>+</sup> ) Symporter (DAACS) Family | 0.71 | 0        |
| CDS number  | 2.A.23    |                                                                                                   | 0.65 | 0        |
| Genome size | 2.A.26    | The Branched Chain Amino Acid: Cation Symporter (LIVCS) Family                                    | 0.61 | 4.44E-16 |
| CDS number  | 2.A.26    |                                                                                                   | 0.61 | 2.22E-16 |
| Genome size | 2.A.45    | The Arsenite-Antimonite (ArsB) Efflux Family                                                      | 0.60 | 1.11E-15 |
| CDS number  | 2.A.45    |                                                                                                   | 0.62 | 0        |
| Genome size | 2.A.118   | The Basic Amino Acid Antiporter (ArcD) Family                                                     | 0.68 | 0        |
| CDS number  | 2.A.118   |                                                                                                   | 0.60 | 8.88E-16 |
| Genome size | 2.A.20    | The Inorganic Phosphate Transporter (PiT) Family                                                  | 0.68 | 0        |
| CDS number  | 2.A.20    |                                                                                                   | 0.60 | 8.88E-16 |
| Genome size | 2.A.108   | The Iron/Lead Transporter (ILT) Family                                                            | 0.69 | 0        |
| CDS number  | 2.A.108   |                                                                                                   | 0.61 | 4.44E-16 |
| Genome size | 2.A.76    | The Resistance to Homoserine/Threonine (RhtB) Family                                              | 0.61 | 8.88E-16 |
| CDS number  | 2.A.76    |                                                                                                   | 0.61 | 4.44E-16 |

|             |        |                                                                                                       |      |   |
|-------------|--------|-------------------------------------------------------------------------------------------------------|------|---|
| Genome size | 3.A.6  | The Type III (Virulence-related) Secretory Pathway (IIISP) Family                                     | 0.62 | 0 |
| CDS number  | 3.A.6  |                                                                                                       | 0.62 | 0 |
| Genome size | 5.B.1  | The gp91 <sup>phox</sup> Phagocyte NADPH Oxidase-associated Cytochrome b <sub>558</sub> (Phox) Family | 0.73 | 0 |
| CDS number  | 5.B.1  |                                                                                                       | 0.67 | 0 |
| Genome size | 9.B.34 | The Kinase/Phosphatase/Cyclic-GMP Synthase/Cyclic di-GMP Hydrolase (KPSH) Family                      | 0.75 | 0 |
| CDS number  | 9.B.34 |                                                                                                       | 0.76 | 0 |
| Genome size | 9.B.72 | The 4 TMS GlpM (GlpM) Family                                                                          | 0.63 | 0 |
| CDS number  | 9.B.72 |                                                                                                       | 0.63 | 0 |

671 **Fig. 1 Cosmopolitan distribution of *Exiguobacterium* strains.** (A) Relative  
672 abundance of 16S rRNA gene sequences among 13 types of habitats. (B) The isolation  
673 sites of 98 *Exiguobacterium* strains in this study (The pink dots represent the  
674 sampling location). (C) Temperature, pH and salinity tolerance test of 103  
675 *Exiguobacterium* strains. In the temperature experiment, the intermediate temperature  
676 between 4°C and 25°C was not tested. The lowest growth temperature was not  
677 recorded for the strain that could not grow at 4°C.

678 **Fig. 2 Phylogenetic analysis of *Exiguobacterium*.** The tree was built using IQ-tree  
679 based on the concatenated amino acid sequence alignments of 1,162 core genes.  
680 Bootstrap support values were calculated from 1000 replicates. ‘T’ represents type  
681 strain: NIO-1109 for *E. enclense*, HHS31 for *E. indicum*, DSM20416 for *E.*  
682 *acetylicum*, 255-15 for *E. sibiricum*, s145 for *E. artemiae*, 7-3 for *E. sibiricum*,  
683 DSM14481 for *E. undae*, JCM12280 for *E. oxidotolerans*, DSM6208 for *E.*  
684 *aurantiacum*, s122 for *E. himgiriensis*, 12-1 for *E. alkaliphilum*, s149 for *E.*  
685 *mexicanum*, DSM16307 for *E. marinum*, s124 for *E. aestuarii* and s121 for *E.*  
686 *profundum*. N1 to N13 represents putative new species.

687 **Fig. 3 Carbon and nitrogen source utilization.** (A) Number of carbohydrate-active  
688 enzymes (CAZymes) encoded in *Exiguobacterium* genomes. (B) Number of plant  
689 polysaccharides degradation enzymes encoded in *Exiguobacterium* genomes. (C)  
690 Number of extracellular peptidases encoded in *Exiguobacterium* genomes. Brackets:  
691 Total number of genomes in each *Exiguobacterium* species. Asterisk: CAZyme with  
692 potential secretion signal.

693 **Fig. 4 Vital genes detected across *Exiguobacterium* genomes for keeping**  
694 **homeostasis in extreme environments.** The heatmap represents the vital gene  
695 number with distribution across the 145 genomes. The maximum-likelihood tree was  
696 constructed by RAxML as described in methods.

697 **Fig. 5 Comparison and Spearman's correlation analysis of genome size with**  
698 **transporter.** (A) Trends in genome size of *Exiguobacterium* species (the species with  
699 5 strains were selected to show the trends). (B) Trends in transporter number of  
700 *Exiguobacterium* species (the species with 5 strains were selected to show the trends).  
701 (C) Comparison of genome size between Group I and Group II (the black '\*\*\*\*'  
702 represents significantly different,  $p < 0.0001$ , Wilcoxon tests). (D) Comparison of  
703 transporter number between Group I and Group II. (E) Spearman's correlation  
704 analysis of genome size, CDS number and transporter number (the genome size, CDS  
705 number and transporter number is shown in the central diagonal; the scatterplots are  
706 depicted with a fitted red line and on the corresponding side for each pairing is the  
707 Spearman rank correlation coefficient  $r_s$ , the red asterisks '\*\*\*' represents  
708 significance levels,  $p < 0.01$ ).

709 **Fig. 6 Comparison of 25 transporter family between Group I and Group II.** All  
710 pairwise comparisons were significantly different (Wilcoxon test).

711 **Fig. S1 Validation of the ability of *Exiguobacterium* spp. to degrade and**  
712 **metabolize complex carbohydrates and peptides.**

713 **Table S1 Information of *Exiguobacterium* 16S rRNA gene sequences in**

714 **Genebank.**

715 **Table S2 Genome features and isolation source of 145 *Exiguobacterium* strains.**

716 **Table S3 Temperature, pH and salinity tolerance test of 103 *Exiguobacterium***  
717 **strains.**

718 **Table S4 Average nucleotide identity (ANI) analysis of 145 *Exiguobacterium***  
719 **strains.**

720 **Table S5 Niches distribution of 145 *Exiguobacterium* strains basing on**  
721 **phylogenetic.**

722 **Table S6 Gene number of carbohydrate-active enzymes (CAZymes) detected in**  
723 **each *Exiguobacterium* genome.**

724 **Table S7 Gene number of extracellular peptidases detected in each**  
725 ***Exiguobacterium* genome using the MEROPS peptidase database.**

726 **Table S8 Genetic basis for *Exiguobacterium* strains adaptation to diverse**  
727 **habitats.**

728 **Table S9 Transporter analysis of 145 *Exiguobacterium* genomes.**

729

730

A

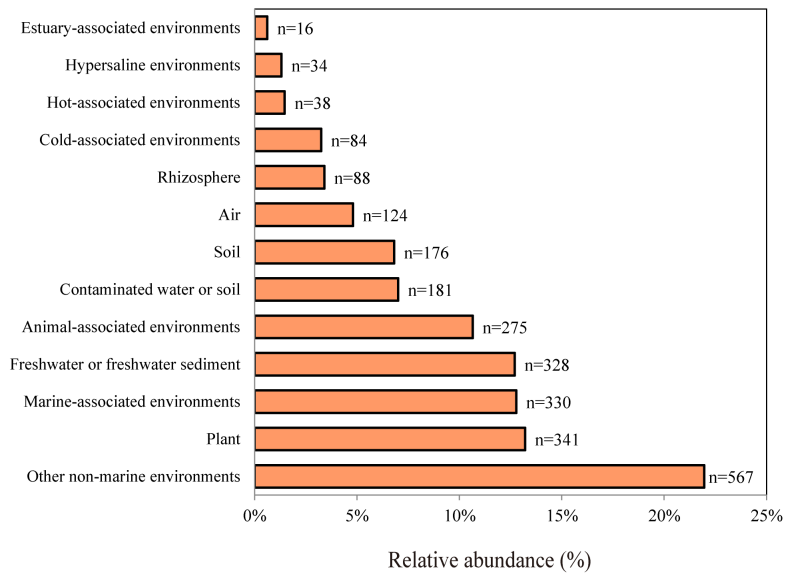

C

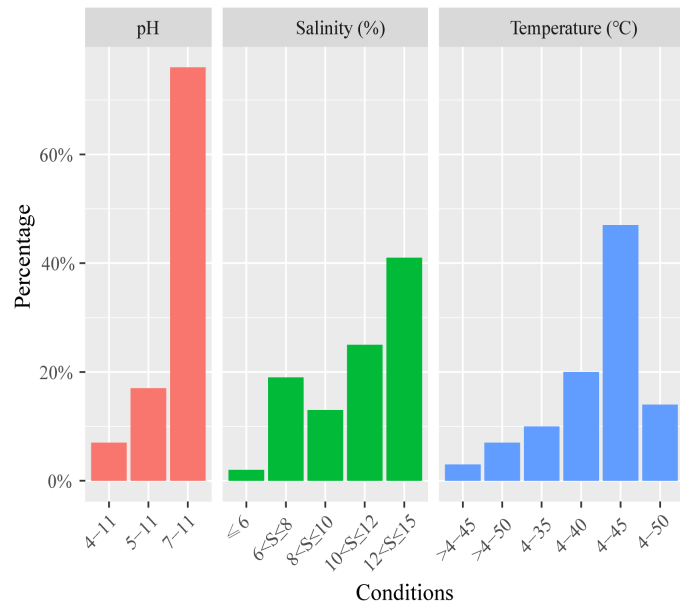

B

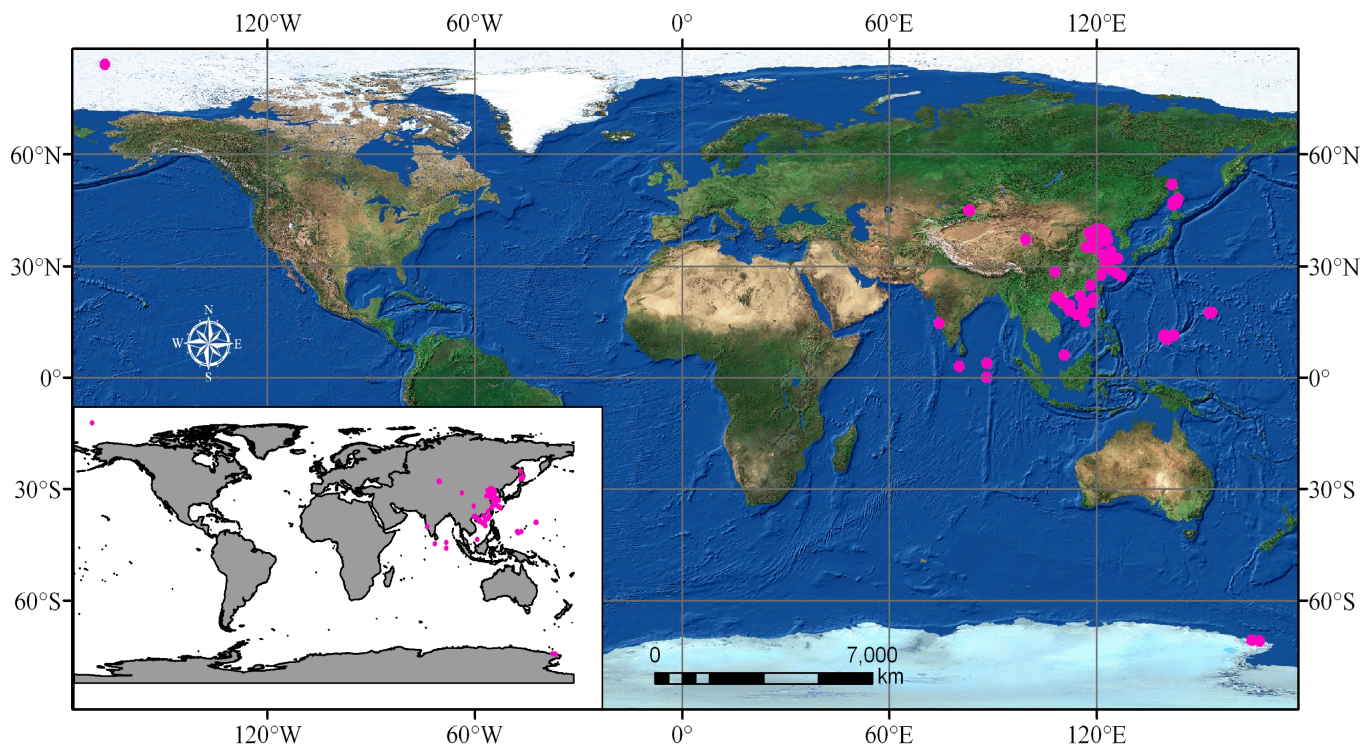



A

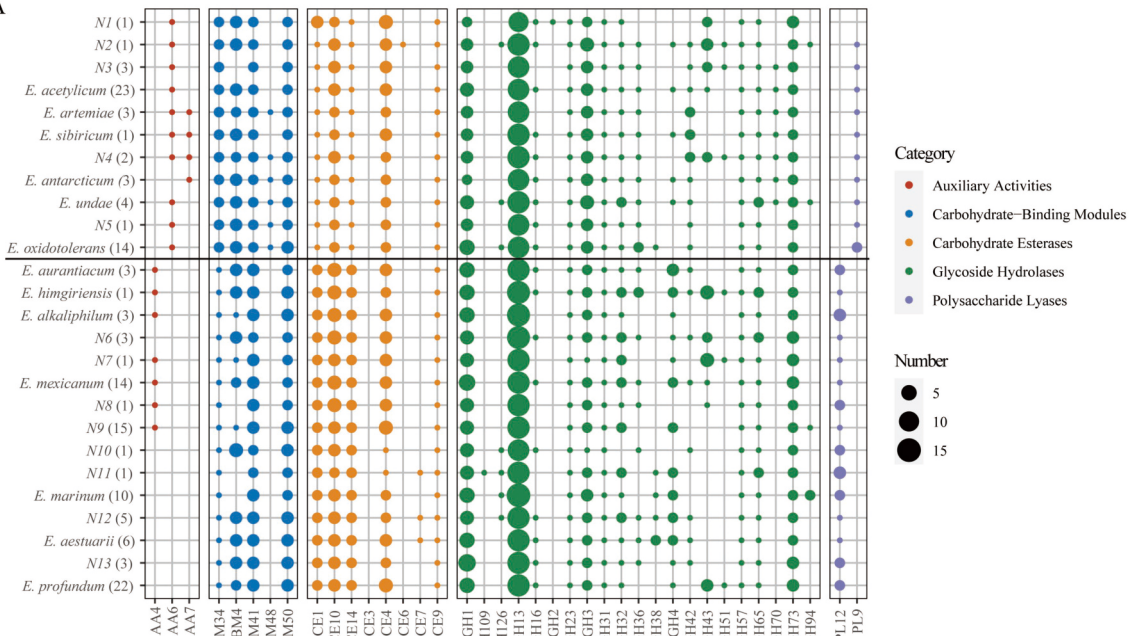

B

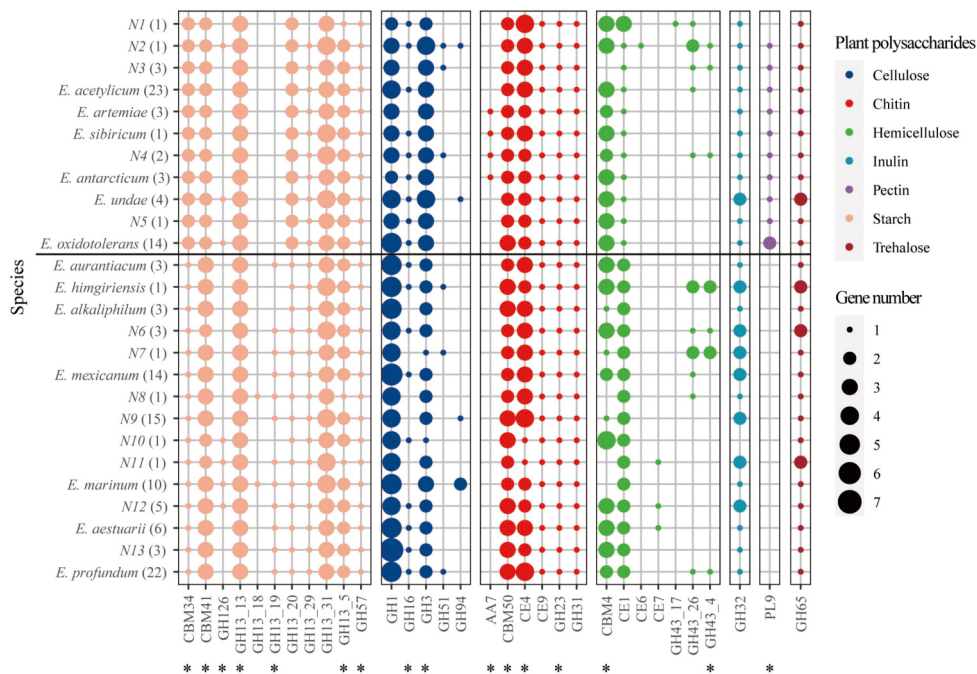

C

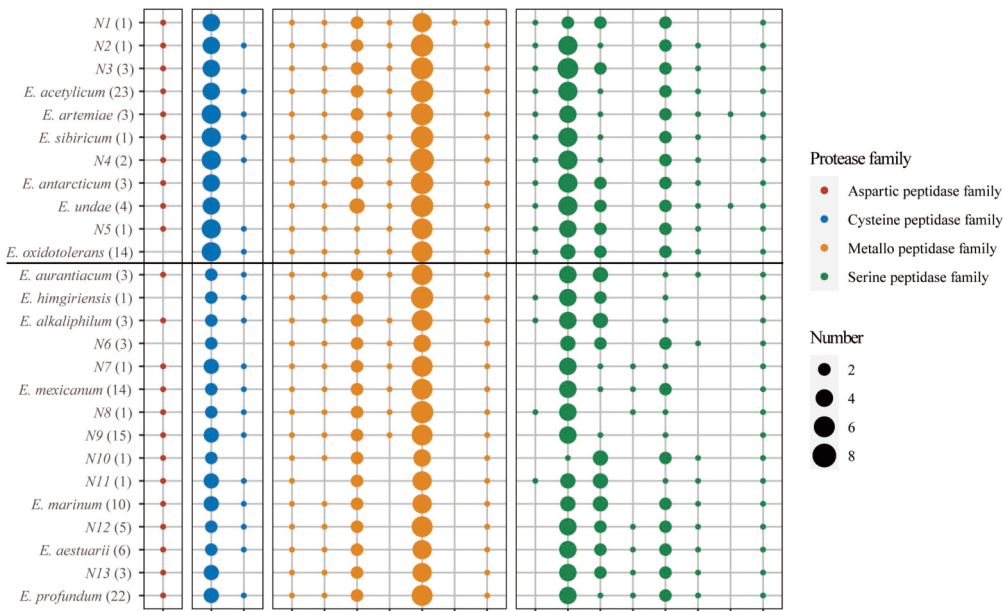



Tree scale: 0.1

Number

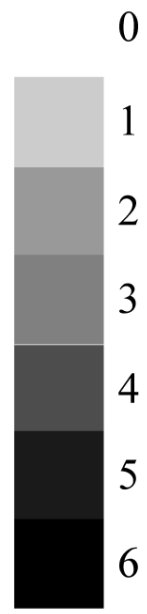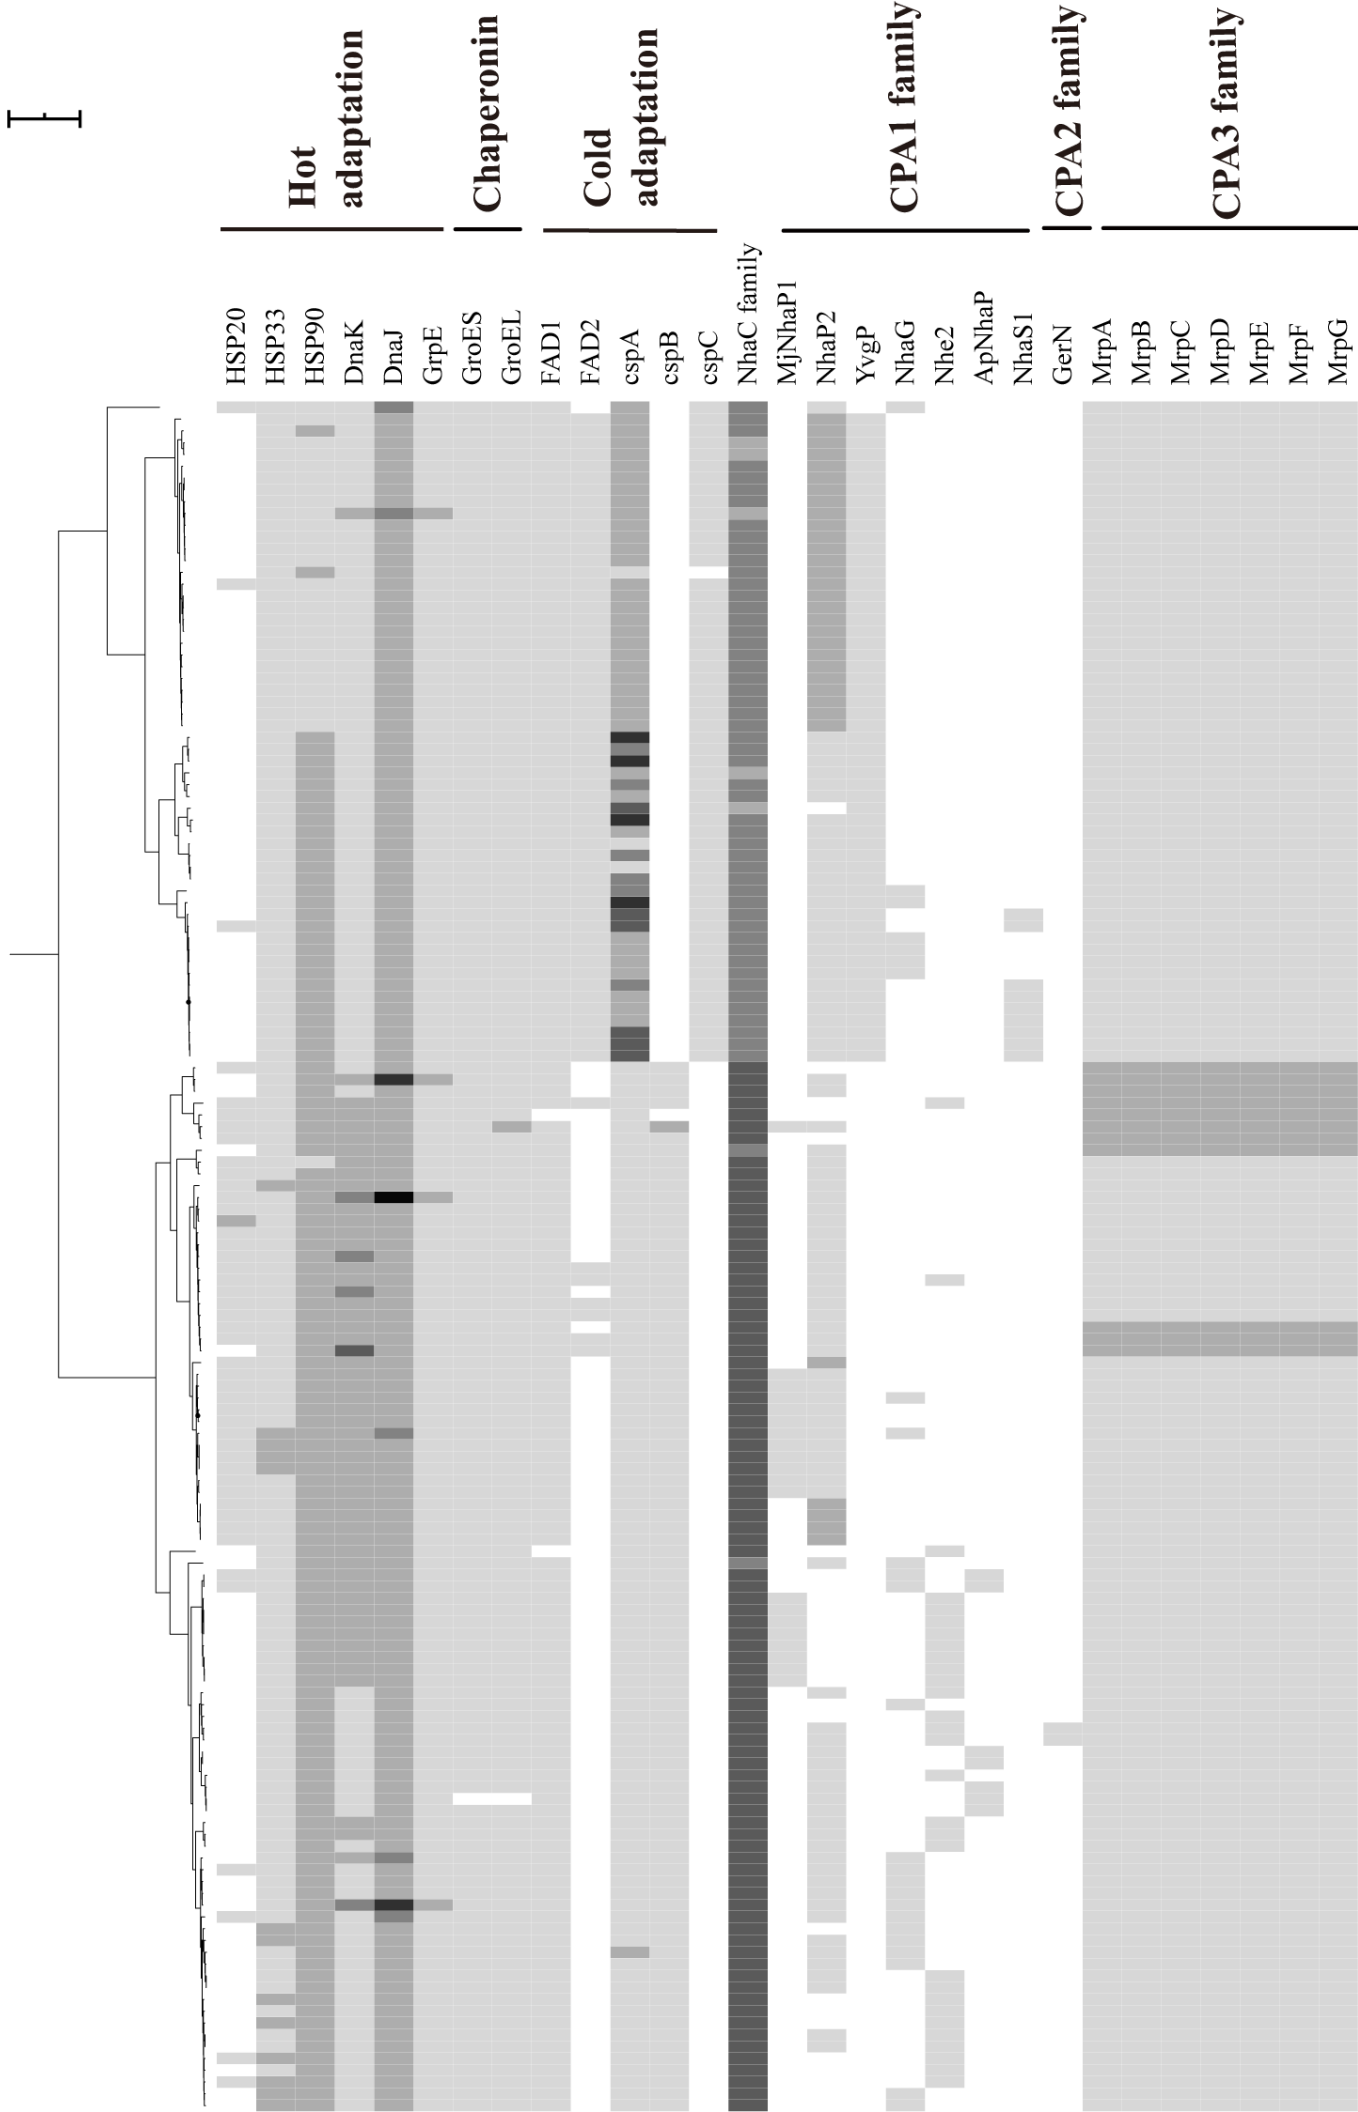

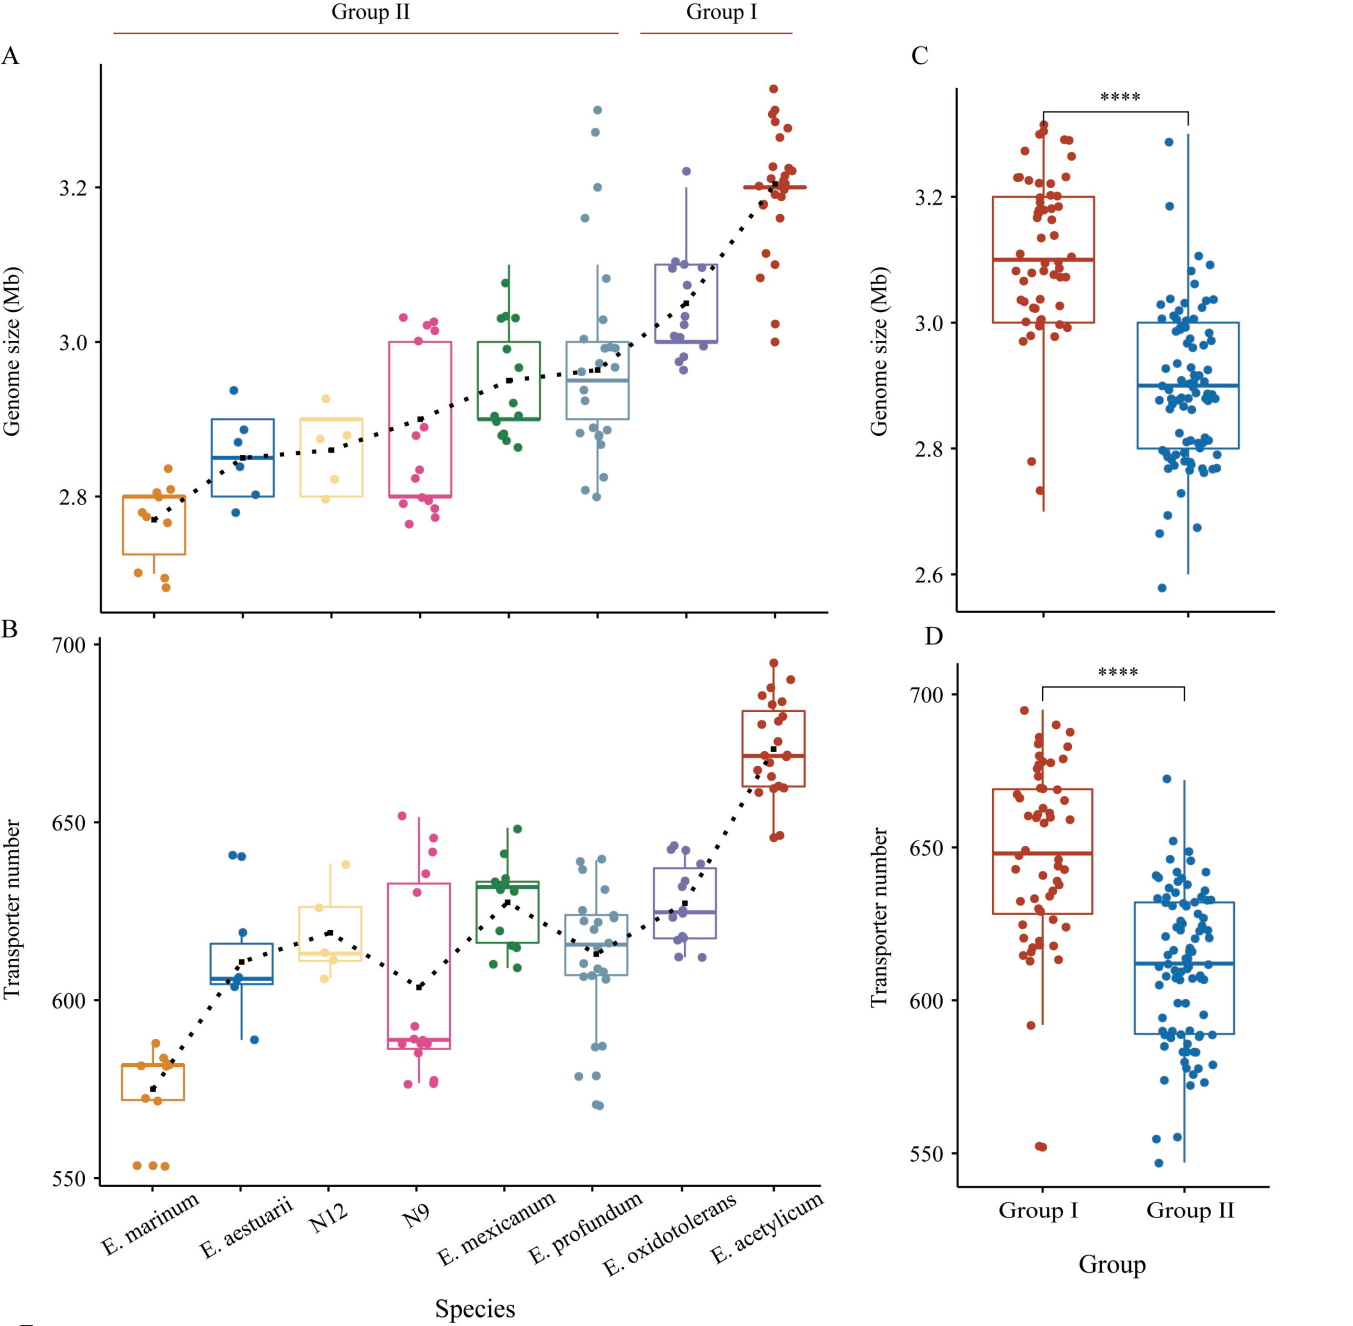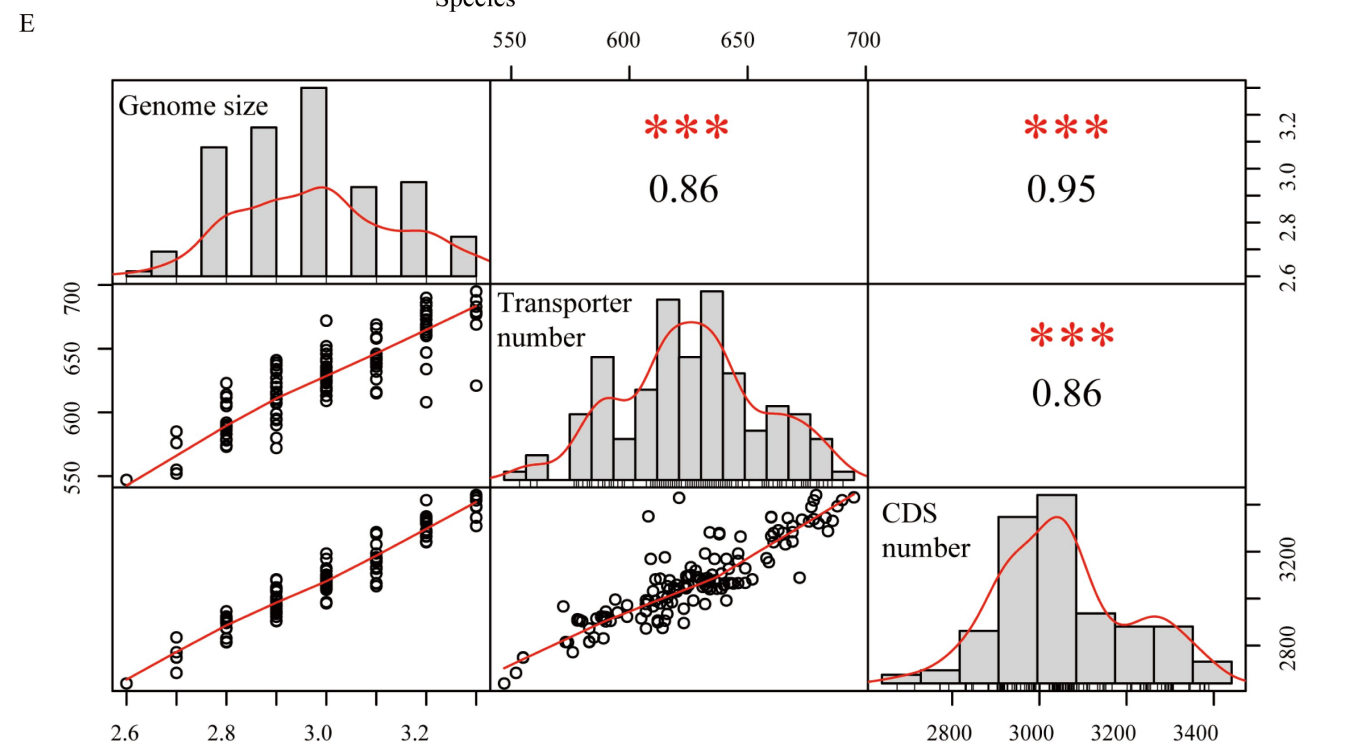

Transporter number

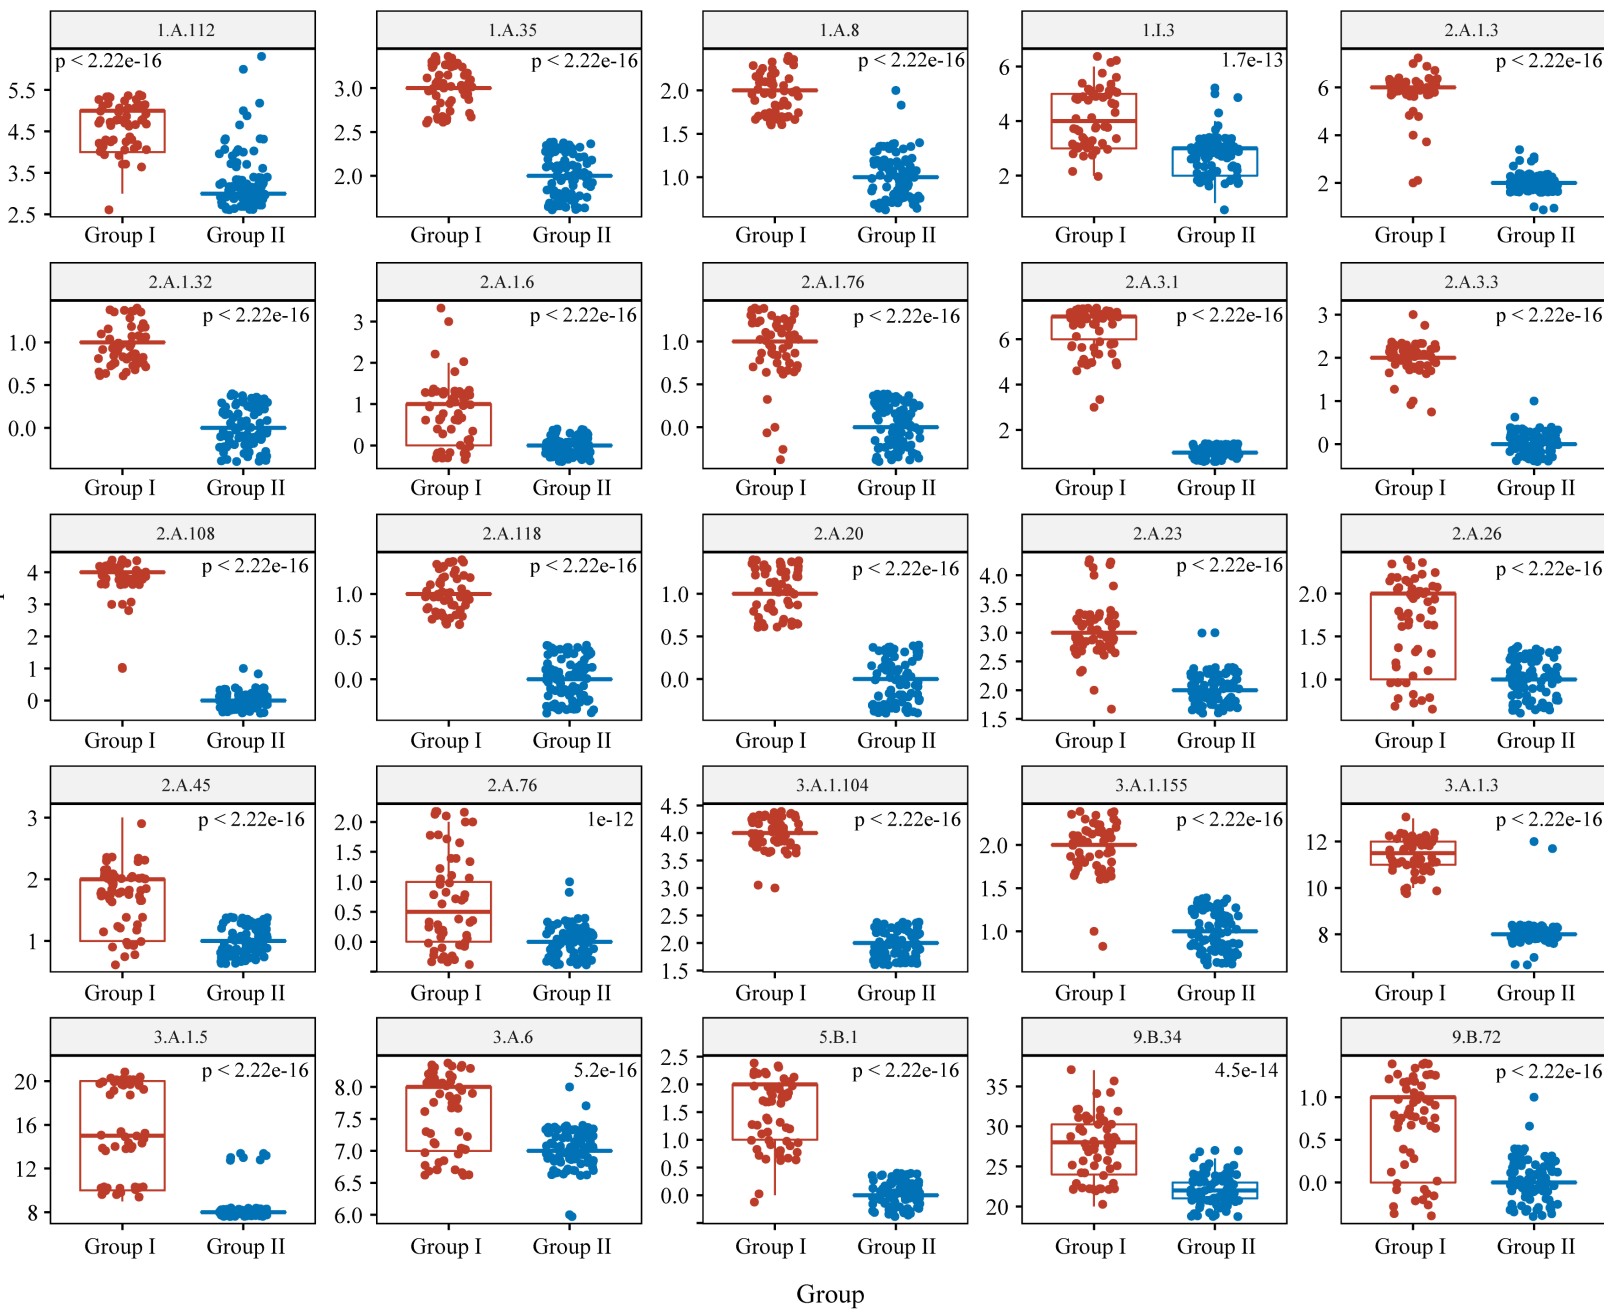

Group
